# Supplementary material for: Insurance Coverage Mandates and the Adoption of Digital Breast Tomosynthesis
Source: PubMed Central journal article supplement (PMC8956980; doi:10.1001/jamanetworkopen.2022.4208), 2022-03-25
Supplement: jamanetwopen-e224208-s001.pdf [file jamanetwopen-e224208-s001.pdf]

## Supplementary Online Content

Richman IB, Long JB, Kyanko KA, Xu X, Gross CP, Busch SH. Insurance coverage mandates and the adoption of digital breast tomosynthesis. *JAMA Netw Open*. 2022;5(3):e224208. doi:10.1001/jamanetworkopen.2022.4208

### **eMethods.**

**eTable 1.** Algorithm for Identifying Screening Mammograms

**eTable 2.** Details of State-Level Coverage Mandates

**eTable 3.** DBT Use (Percentage Point Change)

**eTable 4.** DBT Cost

**eTable 5.** 2D Cost

**eTable 6.** Overall Screening Mammogram Cost (DBT or 2D)

**eTable 7.** Percent of Women Screened With DBT With Any Out-of-Pocket Payment

**eTable 8.** Event Study Model of Out-of-Pocket Payment Among Women Screened With DBT (\$)

**eTable 9.** Difference-in-Differences Estimates

**eTable 10.** Difference-in-Differences Estimates Excluding Transition Period

**eFigure 1.** Timing of State Insurance Coverage Mandate Legislation

**eFigure 2.** Mean DBT Price, Adjusted for 2D Price

**eFigure 3.** Mean DBT Price, Less Mean 2D Price

This supplementary material has been provided by the authors to give readers additional information about their work.

eMethods.

### **Identifying screening mammograms:**

To identify screening mammograms, we adapted a validated algorithm that distinguishes diagnostic and screening mammograms. From among all mammograms, the algorithm first excludes claims for a mammogram with a Healthcare Common Procedure Coding System (HCPCS) code indicating a diagnostic mammogram. Then, the algorithm excludes mammograms performed within 9 months of a previous mammogram. Lastly, the algorithm excludes mammograms performed within 365 days of a breast cancer diagnosis, defined by ICD 9 or 10 codes. We used a 9-month lookback period to be able to maximize the included mammograms. Although this may reduce the specificity of the algorithm, it should not differentially affect mammograms done in different states.

### **Sensitivity Analyses and Alternate Specifications:**

#### *Evaluating Changes in DBT Price, adjusting for 2D price*

In addition to the outcomes detailed in our main manuscript, we also modeled the relationship between coverage mandates and DBT price but included 2D price as a covariate. This model accounts for changes in 2D price which may impact DBT price, since DBT is billed as an add-on to 2D, but are unrelated to DBT coverage mandates. This model may also help account for differential pre-mandate trends observed in both the price of 2D mammography and DBT. This alternate specification is presented in eFigure 2 and eTable 3b.

As an alternative to this specification, we also modeled the difference between mean DBT price and mean 2D price as the outcome (i.e. rather than mean DBT price adjusted for 2D price). Similar to adjusting for 2D price, this outcome captures changes in DBT price after accounting for change in 2D prices that would not be affected by coverage mandates. To calculate this, we took the difference between the mean DBT price and mean 2D price for each state at each time point. Using this value as the outcome, we fit an event study model identical to that used in our main analyses. These alternate specification is presented in eFigure 3.

#### *2X2 Difference-in-Differences:*

As an alternative to an event-study design, we also performed a traditional 2x2 difference-in-differences analysis with a single before/after time period. Here, we considered the four states with at least 2 years of follow up time (CT, IL, PA, NY) as mandate states and all non-mandate states as control states. States with <2 years of follow up post mandate (n=12) and the state of Indiana were excluded. The pre-mandate period spanned from 1/1/2016-12/31/2016 and post mandate was from 1/1/2017 to 6/30/2019. We also performed a second analysis using the same approach but excluding the period from 1/1/2016-1/1/2017, as some states had already enacted legislation during this transition period. Our analyses used a simple specification (below). We clustered standard errors by state to account for repeated measures on each state.

$$Y_{\text{outcome}} = \beta_{\text{period}} + \beta_{\text{intervention}} + \beta_{\text{period*intervention}} + \varepsilon$$

eTable 1. Algorithm for identifying screening mammograms

| Description              | Codes (CPT/HCPCS unless otherwise noted)                                                                                              |
|--------------------------|---------------------------------------------------------------------------------------------------------------------------------------|
| Screening mammography    | 77057, 77067, G0202, +GG (+77063 DBT)                                                                                                 |
| Diagnostic mammography   | G0204, G0206, 77055, 77056, 77065, 77066, +77051 (add-on); DBT indicated by 77061, 77062 as part of main procedure or +G0279 (add-on) |
| History of breast cancer | ICD-9 Diagnosis Codes: 174.*, 233.0, V10.3<br>ICD-10 Diagnosis Code: C50.*; D05.* , Z85.3* , Z86.000                                  |

eTable 2. Details of State-Level Coverage Mandates

| State                     | Date of Insurance Coverage Mandate | Description of legislation                                                                                                                                    | Cost Sharing prohibited with coverage mandate |
|---------------------------|------------------------------------|---------------------------------------------------------------------------------------------------------------------------------------------------------------|-----------------------------------------------|
| Arkansas (AR)             | 8/3/2017                           | Requires insurers to cover cost of 3D mammograms and ultrasounds for routine screenings and policy shall not impose copayment or deductible                   | Yes                                           |
| Colorado (CO)             | 1/1/2021                           | Mandates coverage for breast cancer screening with noninvasive imaging                                                                                        | Yes                                           |
| Connecticut (CT)          | 1/1/2017                           | Requires coverage for tomosynthesis, in addition to a mammogram, and to allow women the option to choose either process                                       | Cost sharing eliminated 1/1/2018              |
| District of Columbia (DC) | 3/22/2019                          | Requires insurers to cover a baseline and annual mammogram for women, including a 3D mammogram                                                                | Yes                                           |
| Illinois (IL)             | 7/1/2016                           | Provides that if coverage includes mammogram, the coverage shall not impose a deductible, coinsurance, copayment, or any other cost-sharing requirement.      | Yes                                           |
| Indiana (IN)              | 7/1/2013                           | Health insurance must provide coverage for appropriate medical screening for females at least 40 years of age who have been found to have high breast density | N/A                                           |
| Kentucky (KY)             | 7/3/2017                           | Requires insurers to cover cost of mammograms and screenings and policy shall not impose copayment or deductible                                              | Yes                                           |
| Louisiana (LA)            | 1/1/2019                           | Requires insurance coverage of DBT by adding DBT to current definition of minimum mammography examination                                                     | Yes                                           |
| Maryland (MD)             | 1/1/2018                           | Expands health insurance for coverage of breast cancer screenings to include coverage for digital tomosynthesis.                                              | Yes                                           |
| Minnesota (MN)            | 1/1/2020                           | Requires coverage for routine screening procedures, including                                                                                                 | Yes                                           |

|                   |           |                                                                                                                                                                               |                                      |
|-------------------|-----------|-------------------------------------------------------------------------------------------------------------------------------------------------------------------------------|--------------------------------------|
|                   |           | mammograms and digital tomosynthesis                                                                                                                                          |                                      |
| Missouri (MO)     | 8/1/2018  | Insurers required to cover cost of 3D mammography                                                                                                                             | Yes                                  |
| New Jersey (NJ)   | 8/1/2018  | Insurance plans must cover digital tomosynthesis to detect or screen for breast cancer                                                                                        | Yes                                  |
| New Hampshire     | 8/7/2018  | Expands definition of mammography to include 3D                                                                                                                               | Cost sharing allowed after 9/10/2019 |
| New York (NY)     | 1/1/2017  | Mandates medically necessary coverage for DBT screenings without copay or deductibles                                                                                         | Yes                                  |
| Oklahoma (OK)     | 11/1/2018 | Added DBT to definition of low-dose mammography and requires insurers to include coverage for DBT                                                                             | Yes                                  |
| Pennsylvania (PA) | 10/1/2015 | 3D mammograms must be covered at no cost to women                                                                                                                             | Yes                                  |
| Texas (TX)        | 9/1/2017  | Requires insurers to cover 3D mammograms                                                                                                                                      | Yes                                  |
| Vermont (VT)      | 1/1/2019  | Requires insurers to cover breast imaging services without imposing cost-sharing requirements                                                                                 | Yes                                  |
| Washington (WA)   | 6/7/2018  | Insurers must include coverage for DBT or 3D mammography under the same terms and conditions currently allowed for mammography, so deductibles and cost sharing is prohibited | Yes                                  |

eTable 3. DBT Use (Percentage point change)

| Period | Estimate* | 95% CI    | Adjusted for ASO membership** | 95% CI   |
|--------|-----------|-----------|-------------------------------|----------|
| -2     | 0.4       | -6.0-6.9  | 1.1                           | -7.2-4.5 |
| -1.5   | 2.1       | -1.6-5.9  | 1.2                           | -2.2-4.6 |
| -1     | -1.5      | -5.3-2.3  | -1.7                          | -5.5-2.1 |
| 0      | 4.1       | 0.7-7.5   | 4.1                           | 0.5-7.7  |
| 0.5    | 5.4       | -0.2-11.0 | 5.3                           | -0.2-1.1 |
| 1      | 7.6       | 0.3-15.0  | 7.0                           | -0.4-1.4 |
| 1.5    | 9.4       | 2.3-16.7  | 8.7                           | 0.2-1.6  |
| 2      | 9.0       | 1.8-16.3  | 8.1                           | 0.7-15.5 |

\*Estimates from primary event-study specification  
 \*\*Estimates from model adjusting for % population with Administrative Services Only (ASO) plans

eTable 4. DBT Cost

| Period | Estimate* | 95% CI       | Adjusted for ASO membership** | 95% CI       | Adjusted for 2D price*** | 95% CI       |
|--------|-----------|--------------|-------------------------------|--------------|--------------------------|--------------|
| -2     | 22.3      | -6.9-51.4    | 21.5                          | -9.8-52.9    | 15.7                     | -17.5-48.8   |
| -1.5   | 18.9      | -5.3-43.1    | 18.4                          | -6.6-43.5    | 11.8                     | -7.5-31.0    |
| -1     | -2.2      | -14.6-10.2   | -2.3                          | -14.9-10.3   | -1.0                     | -12.2-10.2   |
| 0      | 5.5       | -17.4-28.4   | 5.5                           | -17.5-28.4   | 12.3                     | -6.8-31.5    |
| 0.5    | 4.6       | -30.6-39.8   | 4.5                           | -30.6-39.7   | 16.6                     | -9.3-42.5    |
| 1      | -7.3      | -33.9-19.4   | -7.6                          | -34.2-19.0   | 11.0                     | -10.4-32.4   |
| 1.5    | -11.9     | -33.8-10.1   | -12.2                         | 34.1-9.7     | -0.01                    | -21.2-21.3   |
| 2      | -38.7     | -63.9- -13.4 | -39.1                         | -64.2- -14.0 | -32.1                    | -53.3- -10.9 |

\*Estimates from primary event-study specification  
 \*\*Estimates from model adjusted for % population with Administrative Services Only (ASO) plans  
 \*\*\*Estimates from model adjusted for 2D cost

eTable 5. 2D Cost

| Period | Estimate* | 95% CI     | Adjusted for ASO membership** | 95% CI     |
|--------|-----------|------------|-------------------------------|------------|
| -2     | 7.6       | -18.0-33.2 | 6.5                           | -19.5-32.6 |
| -1.5   | 8.2       | -10.6-26.9 | 7.5                           | -11.7-26.8 |
| -1     | -1.4      | -8.5-5.8   | -1.5                          | -8.7-26.8  |
| 0      | -7.9      | -21.3-5.5  | -7.9                          | -21.2-5.5  |
| 0.5    | -13.8     | -39.1-11.5 | -13.9                         | -39.1-11.2 |
| 1      | -21.0     | -44.6-2.6  | -21.5                         | -44.8-1.9  |
| 1.5    | -13.6     | -28.2-0.9  | -14.1                         | -28.6-0.3  |
| 2      | -7.6      | -23.6-8.4  | -8.2                          | -24.0-7.5  |

\*Estimates from primary event-study specification  
 \*\*Estimates from model adjusted for % population with Administrative Services Only (ASO) plans

eTable 6. Overall Screening Mammogram Cost (DBT or 2D)

| Period | Estimate* | 95% CI       | Adjusted for ASO membership** | 95% CI       |
|--------|-----------|--------------|-------------------------------|--------------|
| -2     | 10.5      | -7.4-28.4    | 7.7                           | -10.5-25.9   |
| -1.5   | 11.5      | -3.1-26.1    | 9.8                           | -5.5-25.2    |
| -1     | -0.8      | -7.5-5.9     | -1.1                          | -8.0-5.7     |
| 0      | -1.2      | -12.8-10.4   | -1.2                          | -12.9-10.5   |
| 0.5    | -1.7      | -21.3-18.0   | -1.9                          | -21.5-17.7   |
| 1      | -8.9      | -23.6-5.8    | -10.1                         | -25.0-4.7    |
| 1.5    | -9.6      | -22.6-3.5    | -11.0                         | -24.1-2.1    |
| 2      | -31.4     | -47.6- -15.2 | -33.0                         | -49.5- -16.6 |

\*Estimates from primary event-study specification  
 \*\*Estimates from model adjusted for % population with Administrative Services Only (ASO) plans

eTable 7. Percent of women screened with DBT with any out-of-pocket payment

| Period | Estimate* | 95% CI    | Adjusted for ASO membership** | 95% CI    |
|--------|-----------|-----------|-------------------------------|-----------|
| -2     | 3.8       | -1.3-8.9  | 5.2                           | -1.6-12.1 |
| -1.5   | 2.7       | -1.7-7.2  | 3.6                           | -1.6-8.9  |
| -1     | 2.2       | -1.0-5.3  | 2.4                           | -1.1-5.8  |
| 0      | -0.9      | -3.0-1.1  | -1.0                          | -3.2-12.9 |
| 0.5    | -0.9      | -3.5-1.7  | -0.8                          | -3.5-1.9  |
| 1      | -1.8      | -5.9-2.3  | -1.2                          | -4.4-2.1  |
| 1.5    | -3.9      | -10.6-2.9 | -3.1                          | -9.1-2.8  |
| 2      | -3.0      | -9.3-3.4  | -2.0                          | -7.5-3.3  |

\*Estimates from primary event-study specification  
 \*\*Estimates from model adjusted for % population with Administrative Services Only (ASO) plans

eTable 8. Event study model of out-of-pocket payment among women screened with DBT (\$)

| Period                                                                                                                                              | Estimate* | 95% CI   | Adjusted for ASO Membership** | 95% CI   |
|-----------------------------------------------------------------------------------------------------------------------------------------------------|-----------|----------|-------------------------------|----------|
| -2                                                                                                                                                  | 3.4       | 0.5-6.3  | 3.7                           | -0.2-7.3 |
| -1.5                                                                                                                                                | 1.9       | 0.0-3.7  | 2.1                           | -0.1-4.3 |
| -1                                                                                                                                                  | 1.1       | -0.3-2.4 | 1.1                           | -0.3-2.6 |
| 0                                                                                                                                                   | -0.4      | -1.6-0.7 | -0.4                          | -1.6-0.7 |
| 0.5                                                                                                                                                 | -0.6      | -2.0-0.8 | -0.6                          | -1.9-0.8 |
| 1                                                                                                                                                   | -1.4      | -3.2-0.5 | -1.2                          | -2.8-0.4 |
| 1.5                                                                                                                                                 | -1.7      | -4.4-1.0 | -1.5                          | -3.9-0.9 |
| 2                                                                                                                                                   | -2.1      | -5.3-1.0 | -1.9                          | -4.7-0.8 |
| *Estimates from primary event-study specification<br>**Estimates from model adjusted for % population with Administrative Services Only (ASO) plans |           |          |                               |          |



eTable 9. Difference-in-Differences Estimates

| Outcome<br>(95% CI)                                                               | Pre period             |                        | Post Period            |                        | Difference in<br>Differences | p     |
|-----------------------------------------------------------------------------------|------------------------|------------------------|------------------------|------------------------|------------------------------|-------|
|                                                                                   | No mandate             | Mandate**              | No mandate             | Mandate**              |                              |       |
| DBT Use, %                                                                        | 17.3<br>(10.2-24.3)    | 27.2<br>(24.3-30.0)    | 48.0<br>(39.3-56.7)    | 66.6<br>(62.7-70.5)    | 8.7<br>(3.8-13.7)            | 0.001 |
| Mean DBT<br>price                                                                 | 295.3<br>(246.2-344.4) | 308.6<br>(297.0-320.3) | 329.0<br>(283.7-374.2) | 309.6<br>(295.4-323.9) | -32.6<br>(-52.1- -13.2)      | 0.002 |
| Mean 2D price                                                                     | 252.5<br>(214.3-290.7) | 276.8<br>(271.2-282.3) | 247.3<br>(217.3-277.4) | 265.5<br>(262.7-268.2) | -6.1<br>(-18.6-6.3)          | 0.32  |
| Mean price of<br>any mammo                                                        | 261.6<br>(220.7-302.5) | 288.2<br>(283.5-292.9) | 289.6<br>(250.1-329.1) | 293.5<br>(285.7-301.3) | -22.7<br>(-37.2- -8.1)       | 0.003 |
| Mean OOP*<br>cost for DBT                                                         | 4.7<br>(2.8-6.6)       | 2.4<br>(-0.7-5.4)      | 6.2<br>(2.5-9.9)       | 1.1<br>(0.5-1.7)       | -2.8<br>(-6.3-0.7)           | 0.12  |
| Mean OOP<br>cost if any                                                           | 66.2<br>(53.1-79.2)    | 48.8<br>(45.1-52.5)    | 77.9<br>(63.7-92.1)    | 69.6<br>(63.3-76.0)    | 9.1<br>(-3.6-21.8)           | 0.15  |
| *OOP=Out of pocket                                                                |                        |                        |                        |                        |                              |       |
| ** Note that only 4 mandate states (CT, NY, IL, PA) are included in this analysis |                        |                        |                        |                        |                              |       |

eTable 10. Difference-in-Differences Estimates Excluding Transition Period\*\*

| Outcome<br>(95% CI)                                                                                                                                               | Pre period             |                        | Post Period            |                        | Difference in<br>Differences | p      |
|-------------------------------------------------------------------------------------------------------------------------------------------------------------------|------------------------|------------------------|------------------------|------------------------|------------------------------|--------|
|                                                                                                                                                                   | No mandate             | Mandate***             | No mandate             | Mandate***             |                              |        |
| DBT Use, %                                                                                                                                                        | 12.7<br>(6.5-18.8)     | 17.0<br>(16.5-17.4)    | 48.0<br>(39.2-56.8)    | 66.6<br>(62.7-70.5)    | 14.3<br>(7.6-21.0)           | <0.001 |
| Mean DBT<br>price                                                                                                                                                 | 289.8<br>(240.7-348.9) | 281.9<br>(263.3-300.6) | 329.0<br>(283.7-374.2) | 309.6<br>(295.4-323.9) | -11.4<br>(-32.7- 9.9)        | 0.27   |
| Mean 2D price                                                                                                                                                     | 253.5<br>(214.0-293.0) | 276.8<br>(271.2-282.3) | 247.3<br>(217.2-277.4) | 265.5<br>(262.7-268.2) | -6.0<br>(-19.8-7.8)          | 0.38   |
| Mean price of<br>any mammo                                                                                                                                        | 259.7<br>(217.6-301.7) | 279.1<br>(274.9-283.2) | 289.6<br>(250.1-329.1) | 293.5<br>(285.7-301.3) | -15.5<br>(-28.2- -2.3)       | 0.02   |
| Mean OOP<br>cost for DBT                                                                                                                                          | 4.7<br>(3.3-6.4)       | 2.7<br>(-0.7-5.4)      | 6.2<br>(2.5-9.9)       | 1.1<br>(0.5-1.7)       | -3.0<br>(-6.7-0.7)           | 0.11   |
| Mean OOP<br>cost if any                                                                                                                                           | 63.7<br>(52.1-75.4)    | 39.2<br>(34.1-44.4)    | 77.9<br>(63.7-92.1)    | 69.6<br>(63.3-76.0)    | 16.2<br>(5.0-27.5)           | 0.006  |
| *OOP=Out of pocket<br>**Estimates exclude the period from 1/1/2016-1/1/2017<br>*** Note that only 4 mandate states (CT, NY, IL, PA) are included in this analysis |                        |                        |                        |                        |                              |        |

eFigure 1. Timing of State Insurance Coverage Mandate Legislation

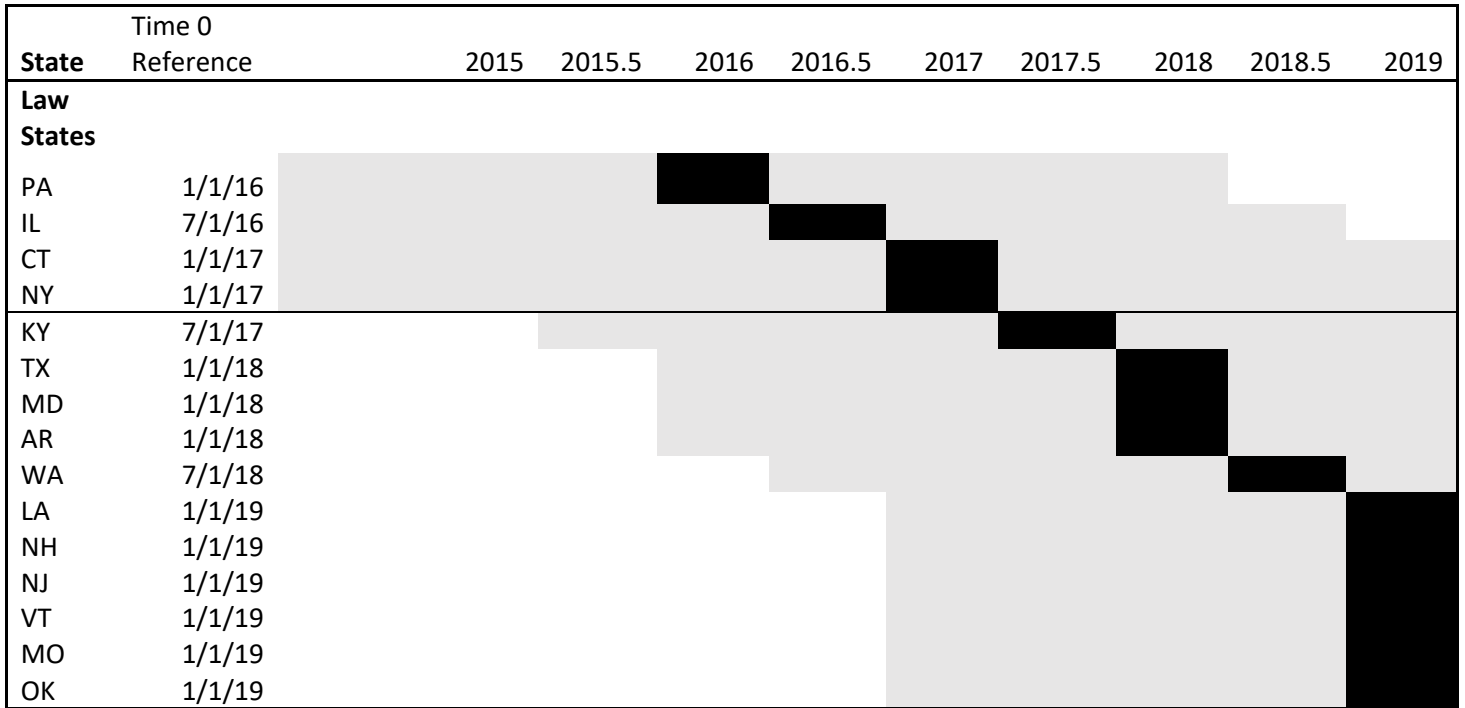

eFigure 1: The figure indicates the timing of enactment of mandate legislation. We considered “time zero” to be the first period in which a legislative mandate was fully enacted. One exception was Kentucky, which enacted a mandate on 7/3/2017, so we considered the period beginning 7/1/2017 to be time zero, rather than the period beginning 1/1/2018.

eFigure 2. Mean DBT Price, Adjusted for 2D Price

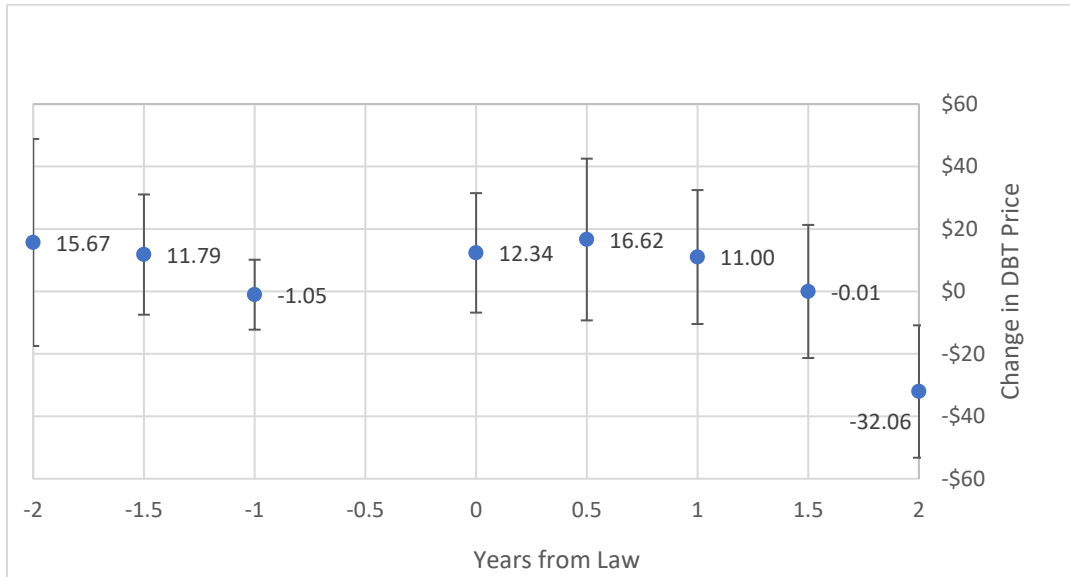

eFigure 2a: Figure depicts the change in DBT prices in states that passed a DBT coverage mandate relative to states that did not pass a mandate over the study period, adjusted for 2D price. Error bars indicate 95% confidence intervals. Prices are adjusted for inflation to 2019 dollars. No value is shown for the “-0.5” period as this is the reference period.

eFigure 3. Mean DBT Price, Less Mean 2D Price

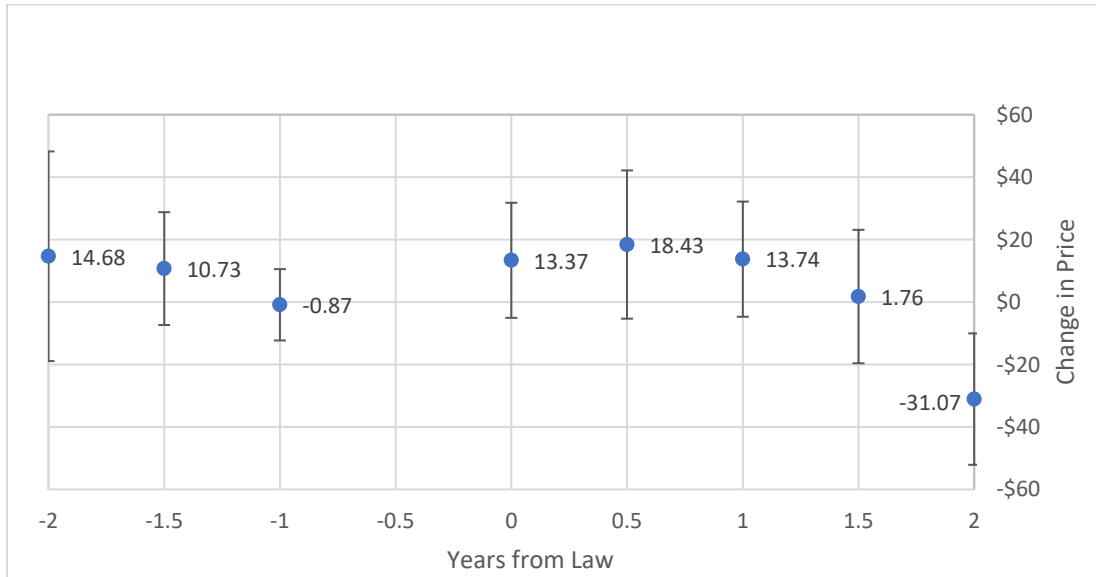

eFigure 3**2b**: Figure depicts the difference in DBT price less 2D price in states that passed a DBT coverage mandate relative to states that did not pass a mandate over the study period. Error bars indicate 95% confidence intervals. Prices are adjusted for inflation to 2019 dollars. No value is shown for the “-0.5” period as this is the reference period.
